# Supplementary material
Source: Springer Nature journal article supplement (https://www.springermedizin.de/resource/supplementary/13041_2013_234_MOESM5_ESM.pdf/25657796)

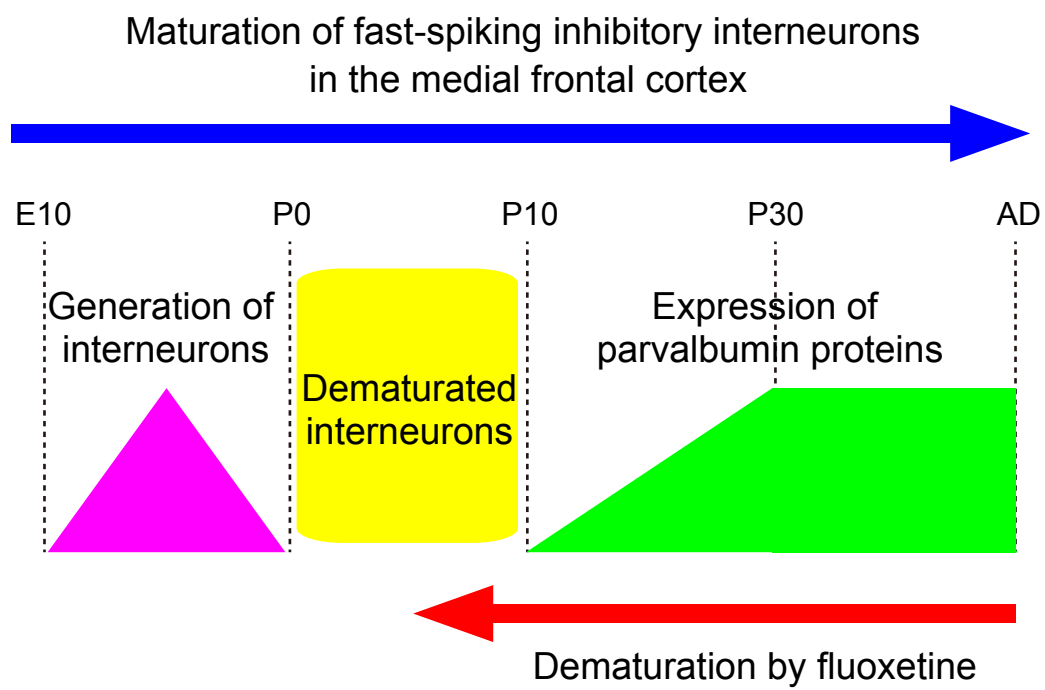

Figure 4

Supplement: MOESM5 [file 25657796]
